# Supplementary material for: Antioxidant Potential of Spray- and Freeze-Dried Extract from Oregano Processing Wastes, Using an Optimized Ultrasound-Assisted Method
Source: MDPI journal article supplement (doi:10.3390/foods12132628), 2023-07-07
Supplement: s1 [file s1]

## Supplementary material

### ANOVA tables for optimization experiments

**Table S1. Analysis of Variance for FRAP**

| Source              | DF | Adj SS   | Adj MS   | F-Value | P-Value |
|---------------------|----|----------|----------|---------|---------|
| Model               | 9  | 0.040373 | 0.004486 | 4.19    | 0.018   |
| Linear              | 3  | 0.033435 | 0.011145 | 10.40   | 0.002   |
| time                | 1  | 0.012602 | 0.012602 | 11.77   | 0.006   |
| Ratio S/S           | 1  | 0.001823 | 0.001823 | 1.70    | 0.221   |
| Ratio E/W           | 1  | 0.019010 | 0.019010 | 17.75   | 0.002   |
| Square              | 3  | 0.002681 | 0.000894 | 0.83    | 0.505   |
| time*time           | 1  | 0.000838 | 0.000838 | 0.78    | 0.397   |
| Ratio S/S*Ratio S/S | 1  | 0.000838 | 0.000838 | 0.78    | 0.397   |
| Ratio E/W*Ratio E/W | 1  | 0.001218 | 0.001218 | 1.14    | 0.311   |
| 2-Way Interaction   | 3  | 0.004257 | 0.001419 | 1.32    | 0.320   |
| time*Ratio S/S      | 1  | 0.004232 | 0.004232 | 3.95    | 0.075   |
| time*Ratio E/W      | 1  | 0.000012 | 0.000012 | 0.01    | 0.916   |
| Ratio S/S*Ratio E/W | 1  | 0.000013 | 0.000013 | 0.01    | 0.916   |
| Error               | 10 | 0.010711 | 0.001071 |         |         |
| Lack-of-Fit         | 5  | 0.004316 | 0.000863 | 0.67    | 0.662   |
| Pure Error          | 5  | 0.006395 | 0.001279 |         |         |
| Total               | 19 | 0.051084 |          |         |         |

**Table S2. Analysis of Variance for % antioxidant capacity**

| Source              | DF | Adj SS  | Adj MS  | F-Value | P-Value |
|---------------------|----|---------|---------|---------|---------|
| Model               | 9  | 161.398 | 17.9331 | 4.76    | 0.011   |
| Linear              | 3  | 80.694  | 26.8979 | 7.15    | 0.008   |
| time                | 1  | 70.462  | 70.4617 | 18.72   | 0.001   |
| Ratio S/S           | 1  | 3.817   | 3.8174  | 1.01    | 0.338   |
| Ratio E/W           | 1  | 6.415   | 6.4147  | 1.70    | 0.221   |
| Square              | 3  | 71.776  | 23.9254 | 6.36    | 0.011   |
| time*time           | 1  | 18.152  | 18.1517 | 4.82    | 0.053   |
| Ratio S/S*Ratio S/S | 1  | 0.430   | 0.4296  | 0.11    | 0.742   |
| Ratio E/W*Ratio E/W | 1  | 4.724   | 4.7235  | 1.26    | 0.289   |
| 2-Way Interaction   | 3  | 8.928   | 2.9761  | 0.79    | 0.526   |
| time*Ratio S/S      | 1  | 2.121   | 2.1208  | 0.56    | 0.470   |
| time*Ratio E/W      | 1  | 5.132   | 5.1317  | 1.36    | 0.270   |
| Ratio S/S*Ratio E/W | 1  | 1.676   | 1.6757  | 0.45    | 0.520   |
| Error               | 10 | 37.637  | 3.7637  |         |         |
| Lack-of-Fit         | 5  | 19.266  | 3.8531  | 1.05    | 0.480   |
| Pure Error          | 5  | 18.371  | 3.6742  |         |         |
| Total               | 19 | 199.035 |         |         |         |

**Table S3. Analysis of Variance for % antioxidant capacity**

| Source              | DF | Adj SS   | Adj MS   | F-Value | P-value |
|---------------------|----|----------|----------|---------|---------|
| Regression          | 9  | 0,002167 | 0,000241 | 2,14    | 0,126   |
| Linear              | 3  | 0,001854 | 0,000618 | 5,48    | 0,017   |
| time                | 1  | 0,001225 | 0,001225 | 10,86   | 0,008   |
| Ratio S/S           | 1  | 0,000153 | 0,000153 | 1,36    | 0,270   |
| Ratio E/W           | 1  | 0,000475 | 0,000475 | 4,22    | 0,067   |
| Square              | 3  | 0,000188 | 0,000063 | 0,56    | 0,655   |
| time*time           | 1  | 0,000162 | 0,000162 | 1,43    | 0,259   |
| Ratio S/S*Ratio S/S | 1  | 0,000035 | 0,000035 | 0,31    | 0,588   |
| Ratio E/W*Ratio E/W | 1  | 0,000000 | 0,000000 | 0,00    | 0,976   |
| Interaction         | 3  | 0,000125 | 0,000042 | 0,37    | 0,777   |
| time*Ratio S/S      | 1  | 0,000094 | 0,000094 | 0,84    | 0,382   |
| time*Ratio E/W      | 1  | 0,000031 | 0,000031 | 0,27    | 0,614   |
| Ratio S/S*Ratio E/W | 1  | 0,000000 | 0,000000 | 0,00    | 0,967   |
| Residual Error      | 10 | 0,001127 | 0,000113 |         |         |
| Lack-of-Fit         | 5  | 0,000429 | 0,000086 | 0,61    | 0,698   |
| Pure Error          | 5  | 0,000699 | 0,000140 |         |         |
| Total               | 19 | 0,003294 |          |         |         |
